# Supplementary material
Source: Springer Nature journal article supplement (https://www.springermedizin.de/resource/supplementary/12882_2014_830_MOESM1_ESM.pdf/9454398)
Supplement: MOESM1 [file 9454398]

TAKE-IT  
Intervention

Common Barriers

TAKE-IT  
Intervention

• Clarify allocation of responsibility for regimen tasks

• Dose reminders  
• Pillbox

• Education (disease and treatment)

Lack of parental supervision/ support

Poor patient – parent communication

Forgetting

Poor organization/planning or scheduling issues

Poor medication/ disease knowledge

• Enlist parents, caregivers, others to provide support

• 'Implementation intentions'

• Problem-solving skills
